# Supplementary material
Source: PubMed Central journal article supplement (PMC2928856)

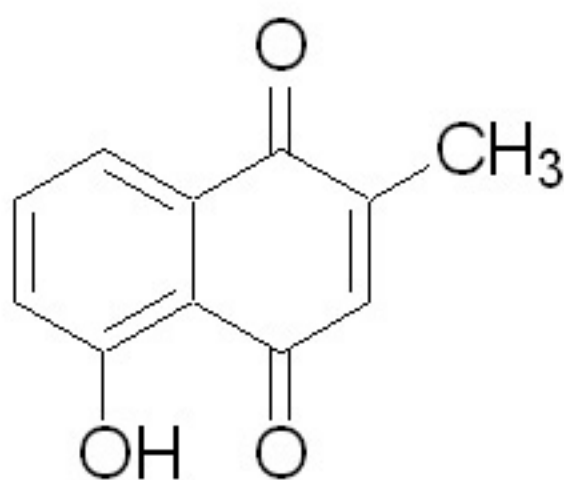

Plumbagin

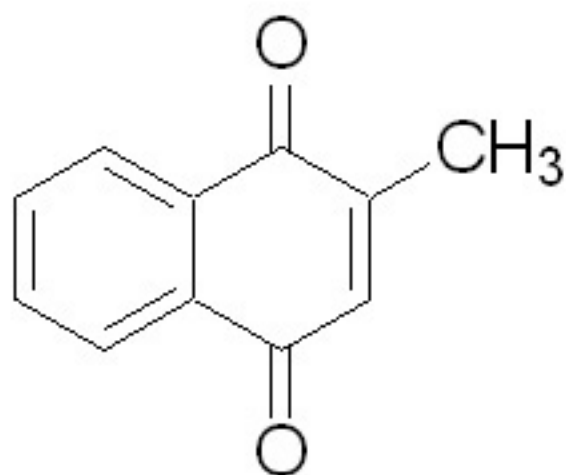

Menadione

Supplement: NIHMS202015-supplement-Supp_Fig_s1.pdf [file NIHMS202015-supplement-Supp_Fig_s1.pdf]
